# Supplementary material for: Cystathionine β-synthase as novel endogenous regulator of lymphangiogenesis via modulating VEGF receptor 2 and 3
Source: PubMed Central journal article supplement (PMC9464209; doi:10.1038/s42003-022-03923-7), 2022-09-10
Supplement: 42003_2022_3923_MOESM1_ESM.pdf [file 42003_2022_3923_MOESM1_ESM.pdf]

## Supplementary Figures and Tables:

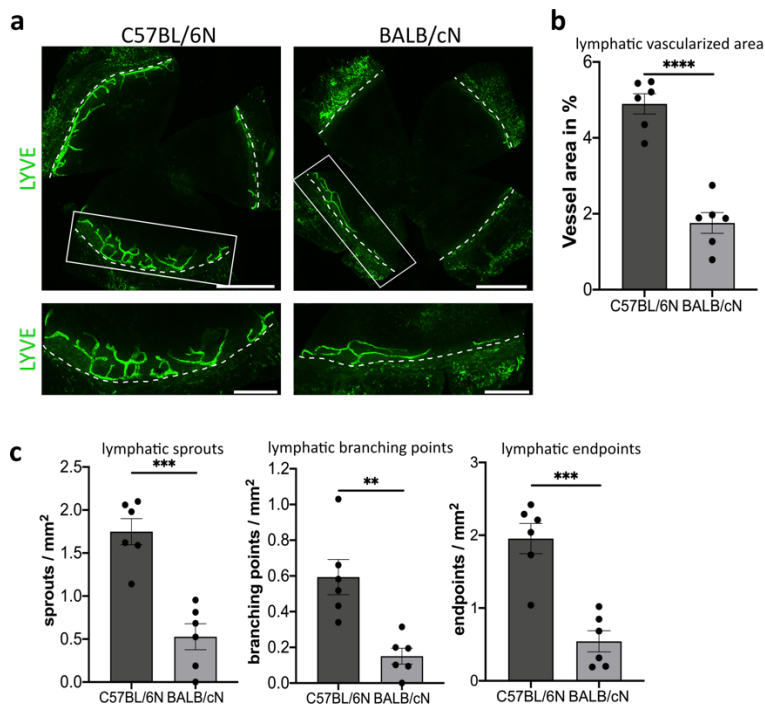

**Supplementary Figure 1: Resting limbal lymphatic vasculature in parental strains of low-lymphangiogenic BALB/cN and high-lymphangiogenic C57BL/6N**

Representative whole mounts of the murine cornea from **(A)** C57BL/6N and BALB/cN stained for LYVE-1. The boxed areas in the top panels are shown in higher magnification in the bottom panels. Dashed lines show the border between the limbus and the cornea. Scale bars: 1 mm top panels and 500  $\mu$ m bottom panels)

**(B)** Quantification of the lymphatic vascularized area of the whole mounts. **(C)** Further characterization of the lymphatic vessel architecture by determination of the number of sprouts, the number of branching points, and the number of end points. Data are expressed as means  $\pm$  SEM (n=6). Data are presented as means  $\pm$  SEM. Statistical significance was calculated by two-tailed t-test \*\*p<0.01, \*\*\*p<0.001, \*\*\*\*p<0.001

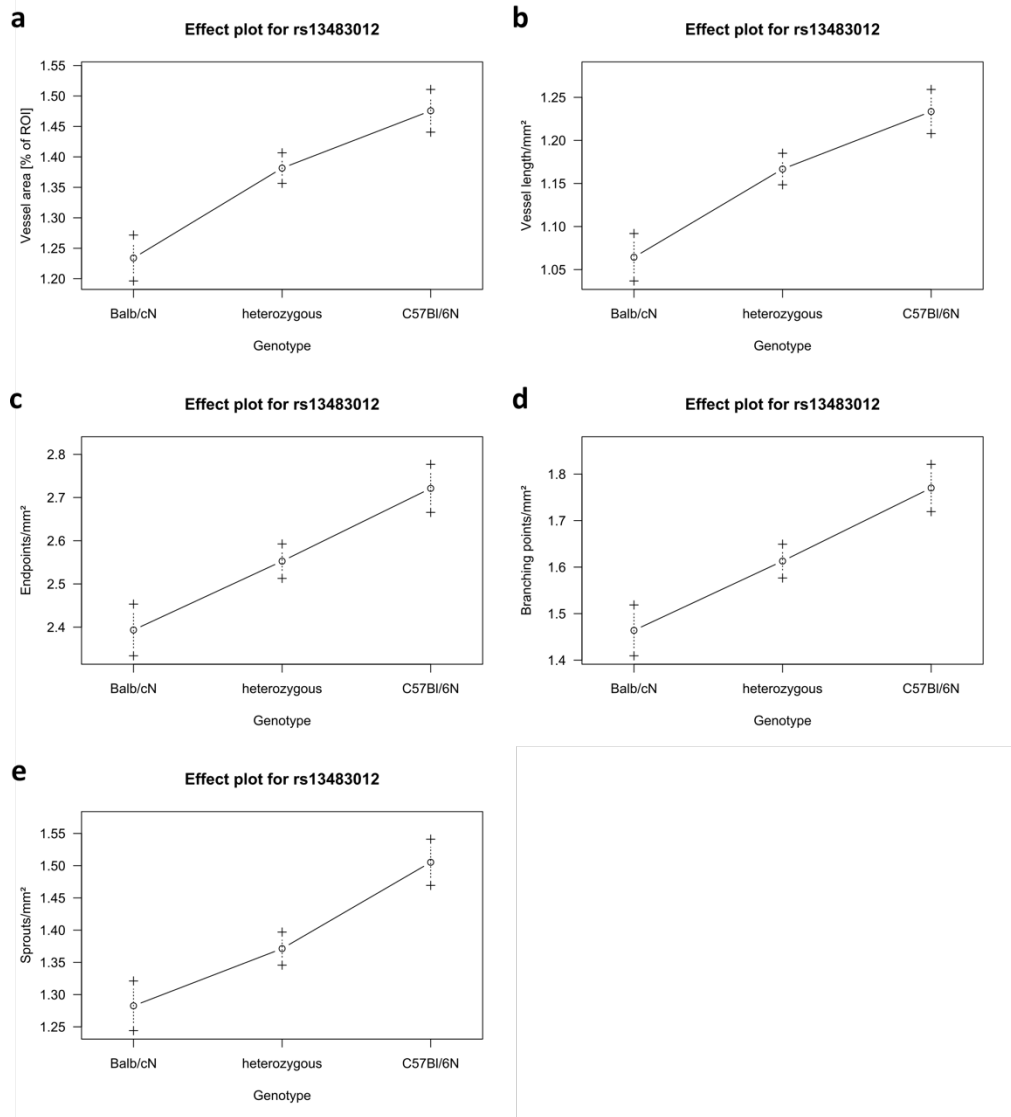

**Supplementary Figure 2: Locus effect plots for the reported transformed phenotypes**

Marker with the maximum logarithm of the odds (LOD) score on chromosome 17, *rs13483012*, all showing recessive BALB/cN alleles. **A:** Vessel area/mm<sup>2</sup>. **B:** Vessel length/mm<sup>2</sup>. **C:** End points/mm<sup>2</sup>. **D:** Branching points/mm<sup>2</sup>. **E:** Sprouts/mm<sup>2</sup>.

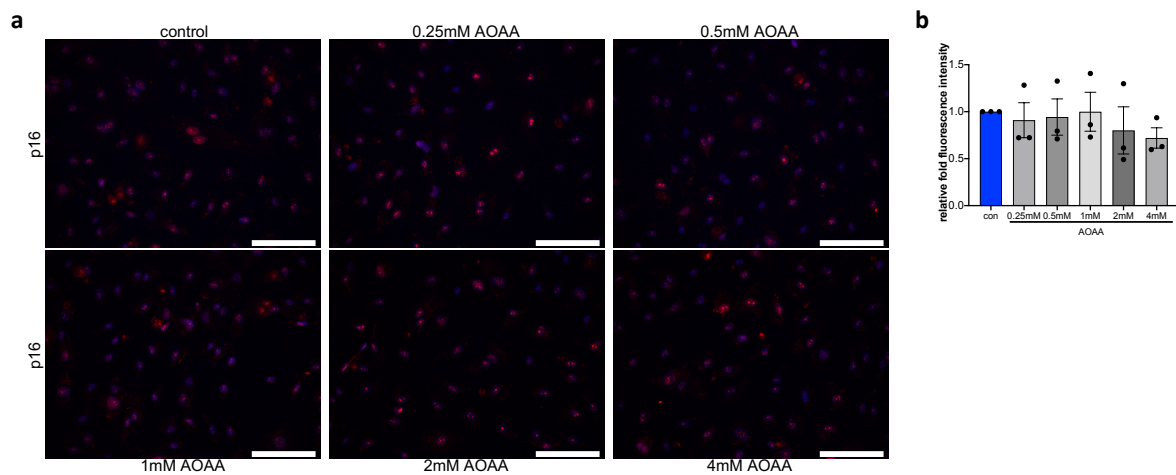

**Supplementary Figure 3: Effect of CBS inhibition by AOAA or CBS gene silencing on p16<sup>INK4A</sup> expression**

(a) Representative immunofluorescence images of HDLECs treated with indicated concentration of AOAA stained for p16<sup>INK4A</sup>. Scale bars: 100  $\mu$ m (b) Quantification of immunofluorescence staining of with indicated concentration of AOAA stained for p16<sup>INK4A</sup>. Data are presented as means  $\pm$  SEM. Statistical significance was analyzed with one-way ANOVA and Dunnett's multiple comparison test (n=3).

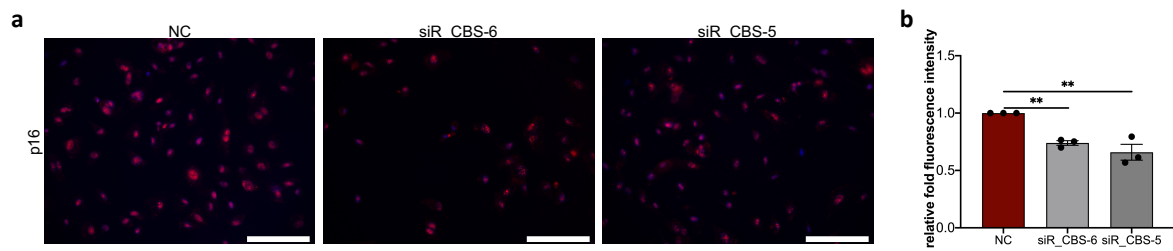

#### Supplementary Figure 4: Silencing CBS reduces p16<sup>INK4A</sup> expression

(a) Representative immunofluorescence images of HDLECs transfected with either siR\_CBS-5, siR\_CBS-6, or negative control (NC) siRNA stained for p16<sup>INK4A</sup>. Scale bars: 100  $\mu$ m. (b) Quantification of immunofluorescence staining of HDLECs transfected with either siR\_CBS-5, siR\_CBS-6, or negative control (NC) siRNA stained for p16<sup>INK4A</sup>. Data are presented as means  $\pm$  SEM. Statistical significance was analyzed with one-way ANOVA and Dunnett's multiple comparison test (n=3).

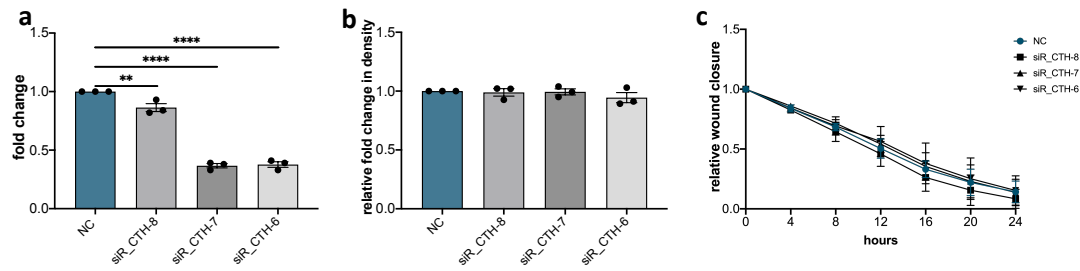

**Supplementary Figure 5: Silencing of CTH in HDLECs did not affect proliferation and migration**

(a) Efficiency of CTH knockdown determined qRT-PCR 72h post-transfection. Reduced expression of CTH in HDLECs after 72h transfected with either siR\_CTH-8, siR\_CTH-7, siR\_CTH-6, or negative control (NC) siRNA (n=3). (b) Effect of CTH silencing on HDLECs proliferation transfected with either siR\_CTH-8, siR\_CTH-7 or siR\_CTH-6 compared with NC siRNA transfected cells. Proliferation was determined 72h after transfection by using IncuCyte Zoom (n=3). (c) Wound healing assay with negative control (NC) siRNA, siR\_CTH-8, siR\_CTH-7 or siR\_CTH-6 treated HDLECs after 72h transfection (n=3). Data are presented as means ± SEM. Statistical significance was analyzed with (a-b) one-way ANOVA and Dunnett’s multiple comparison test or (c) two-way ANOVA and Tukey’s multiple comparison test. \*\*p<0.01; \*\*\*\*p < 0.0001.

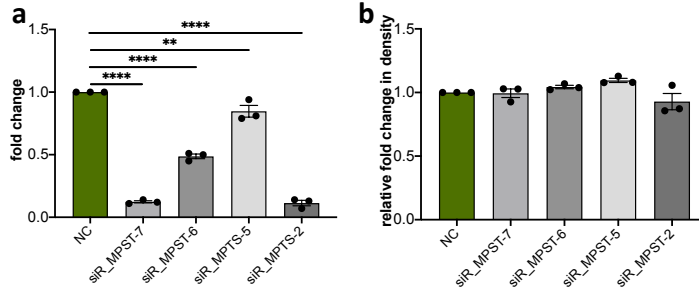

### Supplementary Figure 6: Silencing of MPST in HDLECS did not affect proliferation

(a) Efficiency of MPST knockdown determined qRT-PCR 72h post-transfection. Reduced expression of MPST in HDLECs after 72h transfected with either siR\_MPST-7, siR\_MPST-6, siR\_MPST-5, siR\_MPST-2 or negative control (NC) siRNA (n=3). (b) Effect of CTH silencing on HDLECs proliferation transfected with either siR\_MPST-7, siR\_MPST-6, siR\_MPST-5, or siR\_MPST-2 compared with NC siRNA transfected cells. Proliferation was determined 72h after transfection by using IncuCyte Zoom (n=3). Data are presented as means  $\pm$  SEM. Statistical significance was analyzed with one-way ANOVA and Dunnett's multiple comparison test. \*\*p<0.01; \*\*\*\*p < 0.0001.

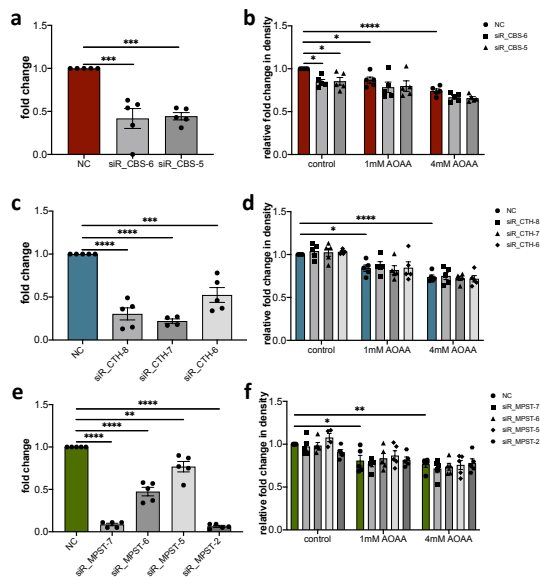

**Supplementary Figure 7: Additional treatment of HDLECs with AOAA after either silencing CBS, CTH or MPST did not influence the proliferation of these cells**

(a) Efficiency of CBS knockdown determined qRT-PCR 72h post-transfection. Reduced expression of CBS in HDLECs after 72h transfected with either siR\_CBS-5, siR\_CBS-6, or negative control (NC) siRNA (n=5). (b) Effect of 1mM and 4mM AOAA on HDLECs proliferation transfected with either siR\_CBS-5, siR\_CBS-6, or negative control (NC) siRNA. Proliferation was determined 72h after transfection by using IncuCyte Zoom (n=5). (c) Efficiency of CTH knockdown determined qRT-PCR 72h post-transfection. Reduced expression of CTH in HDLECs after 72h transfected with either siR\_CTH-8, siR\_CTH-7, siR\_CTH-6, or negative control (NC) siRNA (n=5). (d) Effect of 1mM and 4mM AOAA on HDLECs proliferation transfected with either siR\_CTH-8, siR\_CTH-7 or siR\_CTH-6 compared with NC siRNA transfected cells. Proliferation was determined 72h after transfection by using IncuCyte Zoom (n=5). (e) Efficiency of MPST knockdown determined qRT-PCR 72h post-transfection. Reduced expression of MPST in HDLECs after 72h transfected with either siR\_MPST-7, siR\_MPST-6, siR\_MPST-5, siR\_MPST-2 or negative control (NC) siRNA (n=5). (f) Effect of 1mM and 4mM AOAA on HDLECs proliferation transfected with either siR\_MPST-7, siR\_MPST-6, siR\_MPST-5, or siR\_MPST-2 compared with NC siRNA transfected cells. Proliferation was determined 72h after transfection by using IncuCyte Zoom (n=5). Data are presented as means  $\pm$  SEM. Statistical significance was analyzed with (a, c, e) one-way ANOVA and Tukey's multiple comparison test or (b, d, f) two-way ANOVA and Tukey's multiple comparison test. \*p<0.05 \*\*p<0.01; \*\*\*p < 0.001; \*\*\*\*p < 0.0001.

### Supplementary Table 1: Raw counts table of F0 animals

| Sample ID | Mouse Strain | Replicate | Raw read pairs | Reads pairs after filtering and trimming | Read pairs aligned by Tophat2 | Concordant pair alignment rate to Pseudogenome (Tophat2) | Concordant pair alignment rate to mm10 for comparison | Read pairs counted exonic (Htseq) |
|-----------|--------------|-----------|----------------|------------------------------------------|-------------------------------|----------------------------------------------------------|-------------------------------------------------------|-----------------------------------|
| 175101    | Balb/cN      | 1         | 90.343.042     | 79.404.780                               | 70.078.832                    | 85,2%                                                    | 82,2%                                                 | 40.283.517                        |
| 175102    | Balb/cN      | 2         | 89.083.390     | 79.928.879                               | 70.688.183                    | 85,9%                                                    | 82,7%                                                 | 41.152.725                        |
| 175106    | Balb/cN      | 3         | 83.456.407     | 73.521.405                               | 64.340.105                    | 84,6%                                                    | 81,4%                                                 | 38.766.069                        |
| 175107    | Balb/cN      | 4         | 79.487.806     | 69.808.817                               | 61.027.616                    | 84,5%                                                    | 81,4%                                                 | 36.706.454                        |
| 175108    | C57Bl/6N     | 1         | 85.613.684     | 75.659.511                               | 59.779.387                    | 76,6%                                                    | 76,6%                                                 | 35.838.482                        |
| 175109    | C57Bl/6N     | 2         | 85.208.546     | 75.951.107                               | 61.452.665                    | 78,6%                                                    | 78,5%                                                 | 36.980.562                        |
| 175110    | C57Bl/6N     | 3         | 82.916.298     | 73.326.353                               | 52.840.989                    | 70,4%                                                    | 70,3%                                                 | 29.682.341                        |
| 175111    | C57Bl/6N     | 4         | 87.412.337     | 78.055.095                               | 62.444.083                    | 77,9%                                                    | 77,8%                                                 | 36.313.217                        |

### Supplementary Data 1: Differential expression analysis on the gene level
