# Supplementary material for: Cystathionine β-synthase as novel endogenous regulator of lymphangiogenesis via modulating VEGF receptor 2 and 3
Source: PubMed Central journal article supplement (PMC9464209; doi:10.1038/s42003-022-03923-7), 2022-09-10
Supplement: 42003_2022_3923_MOESM2_ESM.pdf [file 42003_2022_3923_MOESM2_ESM.pdf]

## Description of Additional Supplementary Files

File name: Supplementary Data 1

Description: Differential expression analysis on the gene level.

File name: Supplementary Data 2

Description: Raw data underlying data shown in main figures.
