# Supplementary material for: Cystathionine β-synthase as novel endogenous regulator of lymphangiogenesis via modulating VEGF receptor 2 and 3
Source: PubMed Central journal article supplement (PMC9464209; doi:10.1038/s42003-022-03923-7), 2022-09-10
Supplement: 42003_2022_3923_MOESM5_ESM.pdf [file 42003_2022_3923_MOESM5_ESM.pdf]

## Reporting Summary

Nature Portfolio wishes to improve the reproducibility of the work that we publish. This form provides structure for consistency and transparency in reporting. For further information on Nature Portfolio policies, see our [Editorial Policies](#) and the [Editorial Policy Checklist](#).

### Statistics

For all statistical analyses, confirm that the following items are present in the figure legend, table legend, main text, or Methods section.

n/a | Confirmed

- The exact sample size ( $n$ ) for each experimental group/condition, given as a discrete number and unit of measurement
- A statement on whether measurements were taken from distinct samples or whether the same sample was measured repeatedly
- The statistical test(s) used AND whether they are one- or two-sided  
*Only common tests should be described solely by name; describe more complex techniques in the Methods section.*
- A description of all covariates tested
- A description of any assumptions or corrections, such as tests of normality and adjustment for multiple comparisons
- A full description of the statistical parameters including central tendency (e.g. means) or other basic estimates (e.g. regression coefficient) AND variation (e.g. standard deviation) or associated estimates of uncertainty (e.g. confidence intervals)
- For null hypothesis testing, the test statistic (e.g.  $F$ ,  $t$ ,  $r$ ) with confidence intervals, effect sizes, degrees of freedom and  $P$  value noted  
*Give  $P$  values as exact values whenever suitable.*
- For Bayesian analysis, information on the choice of priors and Markov chain Monte Carlo settings
- For hierarchical and complex designs, identification of the appropriate level for tests and full reporting of outcomes
- Estimates of effect sizes (e.g. Cohen's  $d$ , Pearson's  $r$ ), indicating how they were calculated

*Our web collection on [statistics for biologists](#) contains articles on many of the points above.*

### Software and code

Policy information about [availability of computer code](#)

Data collection

Cellsens Dimension 1.8 & 3.1  
FACS DIVA 8.0.2  
IncuCyte Zoom 2016B  
CFX Manager 2.1 & CFX Maestro 1.1  
QuantStudioTM 6 and 7 Flex Real-Time PCR System Software

## Data analysis

GraphPad Prism 8.4.3  
 FlowJo 8.7.3  
 IncuCyte Zoom 2016B  
 Cell<sup>^</sup>F  
 cutadapt (version 1.10)  
 Sanger mouse genomes project (Release 1505)  
 GRCh38 reference genome using modtools (version 1.0.2)  
 Tophat2 (version 2.1.1)  
 Lapels (version 1.1.1)  
 Ensembl mouse gene model (Release 94) with HTSeq (version 0.7.1)  
 DESeq2 (version 1.30)  
 fdrtool (version 1.2.16)  
 Matlab\_R2021a  
 QuantStudioTM 6 and 7 Flex Real-Time PCR System Software  
 Design & Analysis Software 2.6.0. Real-time PCR System Applied Biosystems

For manuscripts utilizing custom algorithms or software that are central to the research but not yet described in published literature, software must be made available to editors and reviewers. We strongly encourage code deposition in a community repository (e.g. GitHub). See the Nature Portfolio [guidelines for submitting code & software](#) for further information.

## Data

Policy information about [availability of data](#)

All manuscripts must include a [data availability statement](#). This statement should provide the following information, where applicable:

- Accession codes, unique identifiers, or web links for publicly available datasets
- A description of any restrictions on data availability
- For clinical datasets or third party data, please ensure that the statement adheres to our [policy](#)

Sequencing data and normalized expression values were uploaded to the Gene Expression Omnibus at GSE178730.

## Human research participants

Policy information about [studies involving human research participants and Sex and Gender in Research](#).

Reporting on sex and gender

Population characteristics

Recruitment

Ethics oversight

Note that full information on the approval of the study protocol must also be provided in the manuscript.

## Field-specific reporting

Please select the one below that is the best fit for your research. If you are not sure, read the appropriate sections before making your selection.

Life sciences  Behavioural & social sciences  Ecological, evolutionary & environmental sciences

For a reference copy of the document with all sections, see [nature.com/documents/nr-reporting-summary-flat.pdf](https://www.nature.com/documents/nr-reporting-summary-flat.pdf)

## Life sciences study design

All studies must disclose on these points even when the disclosure is negative.

Sample size

Data exclusions

Replication

Randomization

Blinding

# Reporting for specific materials, systems and methods

We require information from authors about some types of materials, experimental systems and methods used in many studies. Here, indicate whether each material, system or method listed is relevant to your study. If you are not sure if a list item applies to your research, read the appropriate section before selecting a response.

## Materials & experimental systems

| n/a                                 | Involved in the study                                           |
|-------------------------------------|-----------------------------------------------------------------|
| <input type="checkbox"/>            | <input checked="" type="checkbox"/> Antibodies                  |
| <input type="checkbox"/>            | <input checked="" type="checkbox"/> Eukaryotic cell lines       |
| <input checked="" type="checkbox"/> | <input type="checkbox"/> Palaeontology and archaeology          |
| <input type="checkbox"/>            | <input checked="" type="checkbox"/> Animals and other organisms |
| <input checked="" type="checkbox"/> | <input type="checkbox"/> Clinical data                          |
| <input checked="" type="checkbox"/> | <input type="checkbox"/> Dual use research of concern           |

## Methods

| n/a                                 | Involved in the study                              |
|-------------------------------------|----------------------------------------------------|
| <input checked="" type="checkbox"/> | <input type="checkbox"/> ChIP-seq                  |
| <input type="checkbox"/>            | <input checked="" type="checkbox"/> Flow cytometry |
| <input checked="" type="checkbox"/> | <input type="checkbox"/> MRI-based neuroimaging    |

## Antibodies

Antibodies used

rabbit anti-mouse LYVE-1 antibody (1:300 dilution; Cat No. 11-034, AngioBio Co., Del Mar, CA)  
 CD31 Clone ER-MP12 (1:200 dilution; Cat No. BM4086, OriGene Technologies GmbH, Herford, Germany)  
 F4/80-AlexaFluor647 (Clone BM3) (1:100, BioLegend, Cat. No. 123122, BioLegend, Koblenz, Germany)  
 goat anti-rabbit AlexaFluor 488 (1:500 dilution; Cat No. A11008 Invitrogen, Darmstadt, Germany)  
 goat anti-rat AlexaFluor 555 (1:500 dilution; Cat No. A21434 Invitrogen, Darmstadt, Germany)  
 CBS Clone B-4 (1:50 dilution; Cat No., sc133154, Santa Cruz, Heidelberg, Germany)  
 p16 Clone EPR1473 (1:100 dilution; Cat No. ab108349, Abcam, Amsterdam, Netherlands)  
 goat anti-mouse AlexaFluor 488 (1:100 dilution; Cat No. A21121 Invitrogen, Darmstadt, Germany)  
 goat anti-rabbit Cy3 (1:100 dilution; Cat No. 111-165-045, Dianova, Hamburg, Germany)

Validation

All antibodies were validated, datasheets are available, and we followed manufacturers's instruction

## Eukaryotic cell lines

Policy information about [cell lines and Sex and Gender in Research](#)

Cell line source(s)

primary human dermal lymphatic endothelial cells

Authentication

Cell were purchased from Promocell (Heidelberg)

Mycoplasma contamination

The human dermal lymphatic endothelial cell were tested for mycoplasma with the MycVenor GeM Mycoplasma-Diagnosis kit (Minerva Biolabs)

Commonly misidentified lines  
(See [ICLAC](#) register)

No misidentified cell lines used

## Animals and other research organisms

Policy information about [studies involving animals](#); [ARRIVE guidelines](#) recommended for reporting animal research, and [Sex and Gender in Research](#)

Laboratory animals

Male C57BL/6N and female or male BALB/cN mice, aged between 8 and 10 weeks;  
 Mice used for the suture-induced inflammatory corneal neovascularization assay were 6- to 10-week-old female C57BL/6Ncrl or BALB/cAnNCrl mice.

Wild animals

This study did not involve wild animal.

Reporting on sex

The sex of the animals does not influence the research question or the target formation. However, for better comparability with previously obtained findings only female animals were used.

Field-collected samples

This study did not involve samples collected from the field.

Ethics oversight

The experiments were approved by the local animal care committee LANUV North Rhine-Westphalia (AZ 84-02.05.2011.210 and AZ 81-02.04.2020.A199) and are in accordance with institutional and national guidelines.

Note that full information on the approval of the study protocol must also be provided in the manuscript.

## Plots

Confirm that:

- The axis labels state the marker and fluorochrome used (e.g. CD4-FITC).
- The axis scales are clearly visible. Include numbers along axes only for bottom left plot of group (a 'group' is an analysis of identical markers).
- All plots are contour plots with outliers or pseudocolor plots.
- A numerical value for number of cells or percentage (with statistics) is provided.

## Methodology

Sample preparation

For the apoptosis assays the BioLegend FITC Annexin V apoptosis detection kit with manufacturer. HDLEC were seeded onto a 6-well plate at a cell density of  $1.25 \times 10^5$ /well in complete endothelial cell growth medium MV2 (PromoCell, Heidelberg, Germany). On the next day, the cells were incubated in basal medium supplemented with 1% FCS (minimal medium) for 1h. Following treatment of HDLECs with different concentrations of AOAA (0.25mM, 0.5mM, 1mM, 2mM, 4mM) for 24h, cells were harvested, stained according manufacturers instruction. HDLEC were seeded onto a 6-well plate at a cell density of  $1.25 \times 10^5$ /well in complete endothelial cell growth medium MV2 (PromoCell, Heidelberg, Germany). On the next day, the cells were transfected with CBS specific siRNA (siR\_CBS-6 or siR\_CBS-5) or non specific siRNA NC control. 72h after transfection cells were harvested, stained according manufacturers instruction.

Instrument

Bioscience FACS Canto II

Software

data collection: FACS DIVA 8.0.2  
data evaluation: FlowJo 8.7.2

Cell population abundance

The cells used are commercially acquired pure primary lymphatic endothelial cells. The percentage of cells in the FSC/SSC gate is min. 85%.

Gating strategy

1. FSC/SSC -> 2. doublet discrimination -> 3. Annexin V-FITC / 7AAD

- Tick this box to confirm that a figure exemplifying the gating strategy is provided in the Supplementary Information.
